# Supplementary material for: Structural characterization of manganese and iron complexes with methylated derivatives of bis(2-pyridylmethyl)-1,2-ethanediamine reveals unanticipated conformational flexibility
Source: Royal Society of Chemistry journal article supplement (doi:10.1039/c0dt01556c), 2011-01-01
Supplement: c0dt01556c.pdf [file c0dt01556c.pdf]

## Supporting Information for

### Structural Characterization of Manganese and Iron Complexes with Methylated Derivatives of Bis(2-pyridylmethyl)-1,2-ethanediamine Reveals Unanticipated Conformational Flexibility

Cristina M. Coates, Kenton Hagan, Casey A. Mitchell, John D. Gordon, and Christian R. Goldsmith\*

*Department of Chemistry & Biochemistry, Auburn University, Auburn, AL 36849*

\*To whom correspondence should be addressed: [crgoldsmith@auburn.edu](mailto:crgoldsmith@auburn.edu)

#### *Contents*

Pages S2-S4: **Figures S1-6.** Electron paramagnetic resonance (EPR) spectra of Mn(II) complexes in N,N-dimethylformamide (DMF).

Page S5-7: **Figures S7-9.** Proton nuclear magnetic resonance ( $^1\text{H}$  NMR) spectra of  $[\text{Fe}(\text{L}^{\text{Me}2})\text{Cl}_2]$  and  $[\text{Fe}(\text{L}^{\text{Me}4})\text{Cl}_2]$  in  $\text{CD}_3\text{CN}$ .

Pages S8-13: **Figures S10-21.** Cyclic voltammograms for Mn(II) and Fe(II) complexes with methylated bispicen ligands in acetonitrile (MeCN).

Page S14: **Table S1.** Selected crystallographic data for  $[\text{Mn}(\text{L})(\text{H}_2\text{O})\text{Cl}](\text{MnCl}_4)$ ,  $[\text{Mn}(\text{L}^{\text{Me}3})(\text{H}_2\text{O})\text{Cl}_2]$ , and  $[\text{Mn}(\text{L}^{\text{Me}2'-\text{ox}})\text{Cl}_2]$ .

Page S15: **Figure S22.** ORTEP representation of the cation in  $[\text{Mn}(\text{L})(\text{H}_2\text{O})\text{Cl}]_2(\text{MnCl}_4)$ ; **Figure S23.** ORTEP representation of  $[\text{Mn}(\text{L}^{\text{Me}3})(\text{H}_2\text{O})\text{Cl}_2]$ .

Page S16: **Figure S24.** ORTEP representation of  $[\text{Mn}(\text{L}^{\text{Me}2'-\text{ox}})\text{Cl}_2]$ .

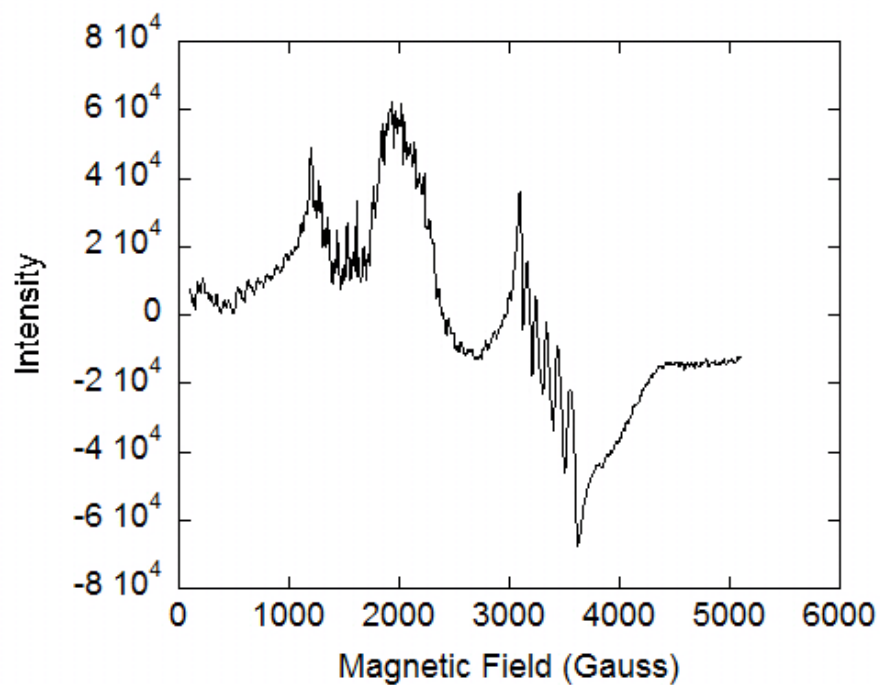

**Figure S1.** X-band EPR spectrum of a 1 mM sample of  $[\text{Mn}(\text{L})\text{Cl}_2]$  in DMF at 50 K.

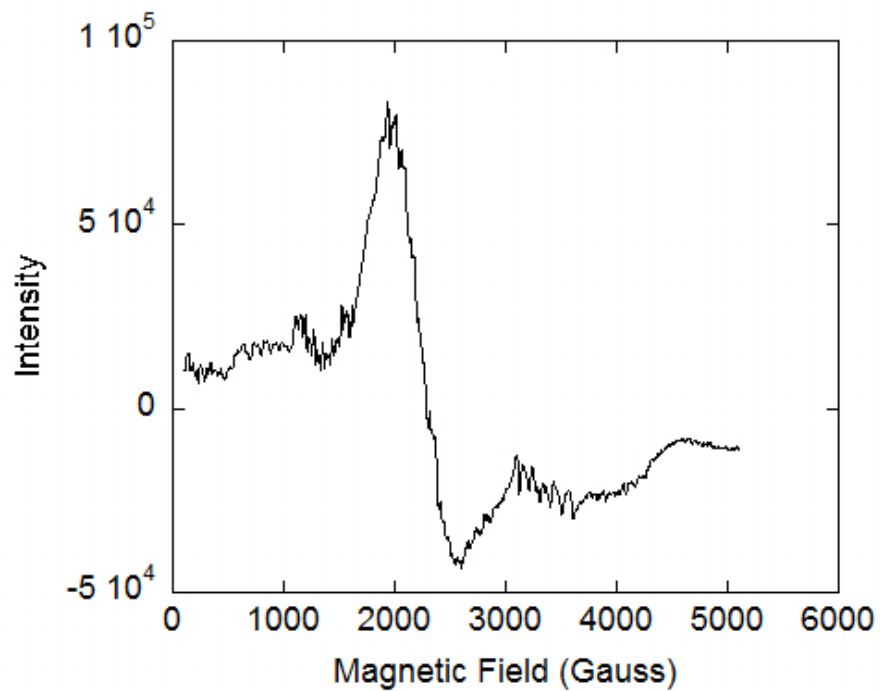

**Figure S2.** X-band EPR spectrum of a 1 mM sample of  $[\text{Mn}(\text{L}^{\text{Me}1})\text{Cl}_2]$  in DMF at 50 K.

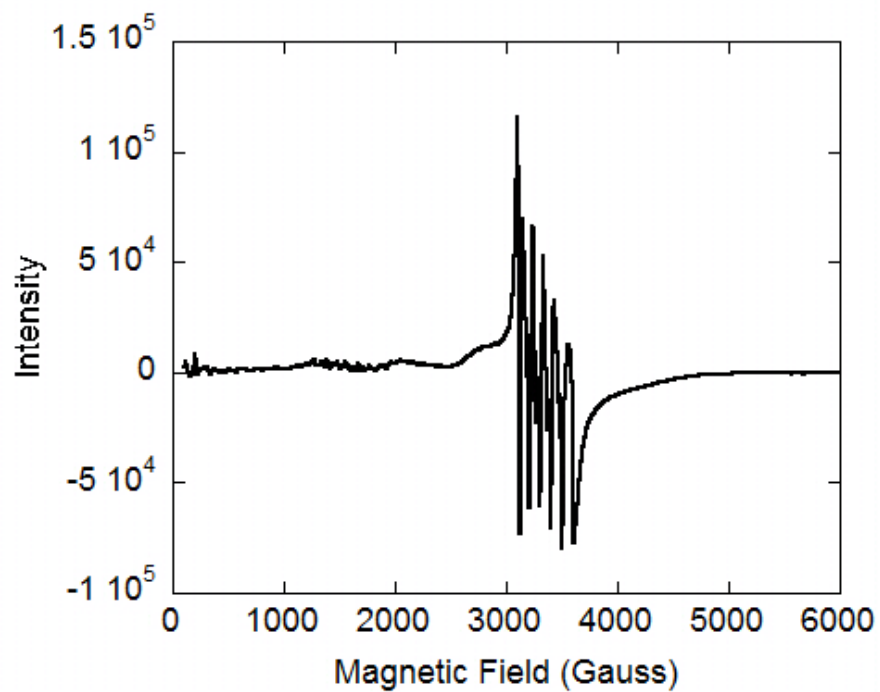

**Figure S3.** X-band EPR spectrum of a 1 mM sample of  $[\text{Mn}(\text{L}^{\text{Me}2})\text{Cl}_2]$  in DMF at 50 K.

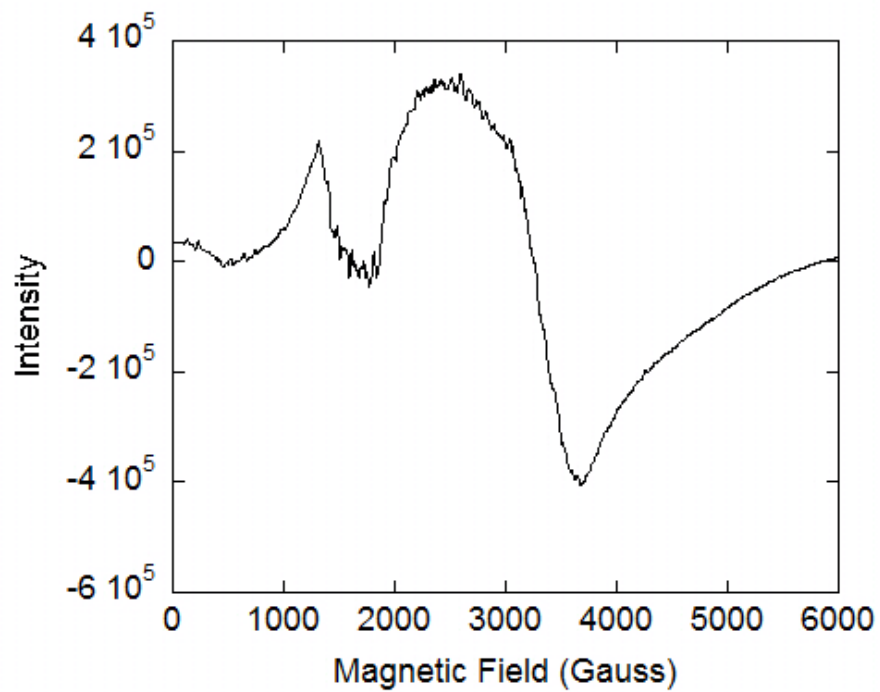

**Figure S4.** X-band EPR spectrum of a 1 mM sample of  $[\text{Mn}(\text{L}^{\text{Me}2'})\text{Cl}_2]$  in DMF at 50 K.

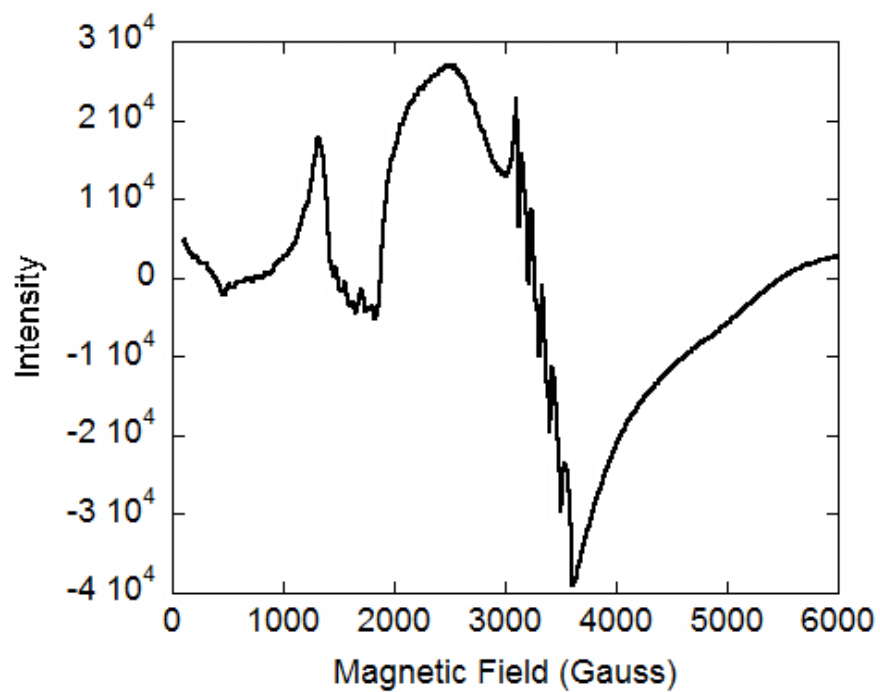

**Figure S5.** X-band EPR spectrum of a 1 mM sample of  $[\text{Mn}(\text{L}^{\text{Me}3})\text{Cl}_2]$  in DMF at 50 K.

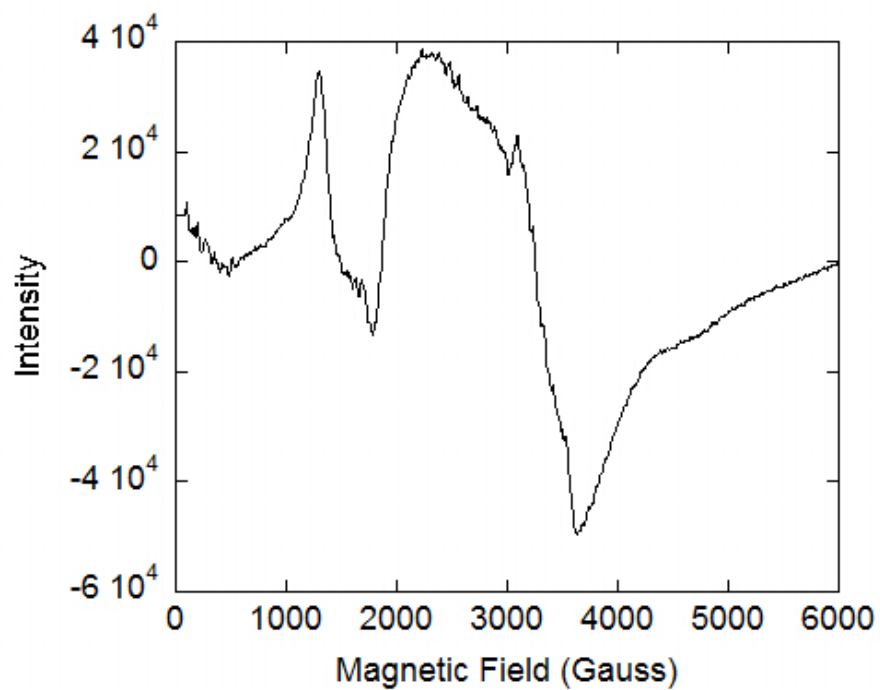

**Figure S6.** X-band EPR spectrum of a 1 mM sample of  $[\text{Mn}(\text{L}^{\text{Me}4})\text{Cl}_2]$  in DMF at 50 K.

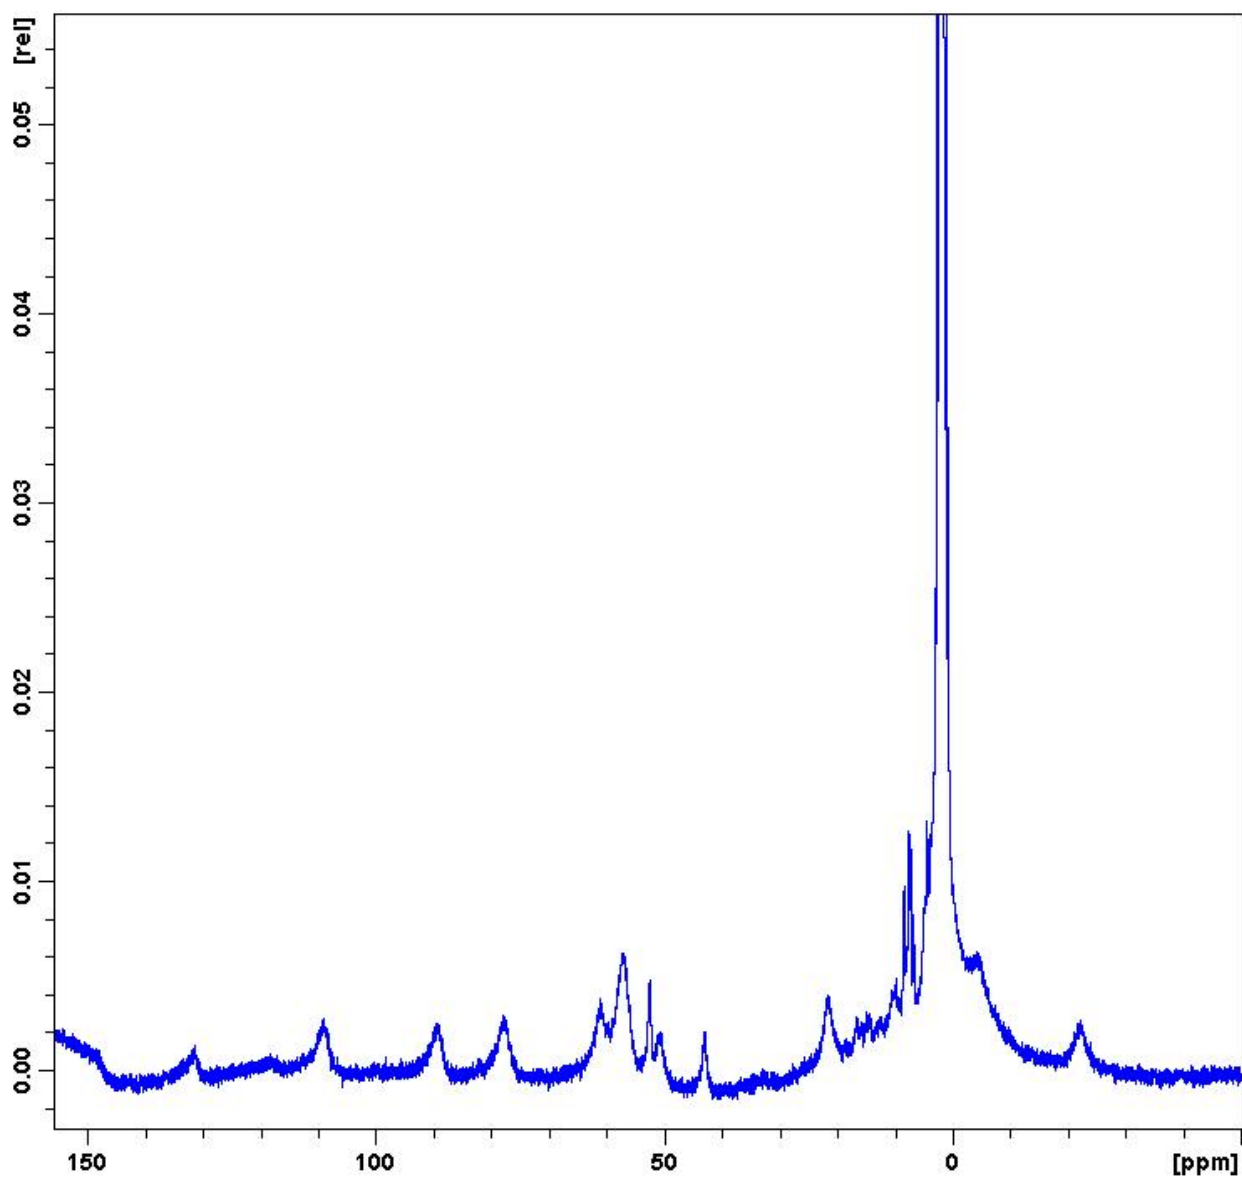

**Figure S7.** <sup>1</sup>H NMR spectrum of a 20 mM solution of [Fe(L<sup>Me</sup><sub>2</sub>)Cl<sub>2</sub>] in CD<sub>3</sub>CN. Major peaks outside the diamagnetic region: δ 131.4, 118.0, 109.2, 89.3, 77.9, 61.1, 57.2, 52.8, 50.7, 43.0, 21.7, 10.1, -4.4, -22.3. These data were recorded on a 250 MHz NMR instrument.

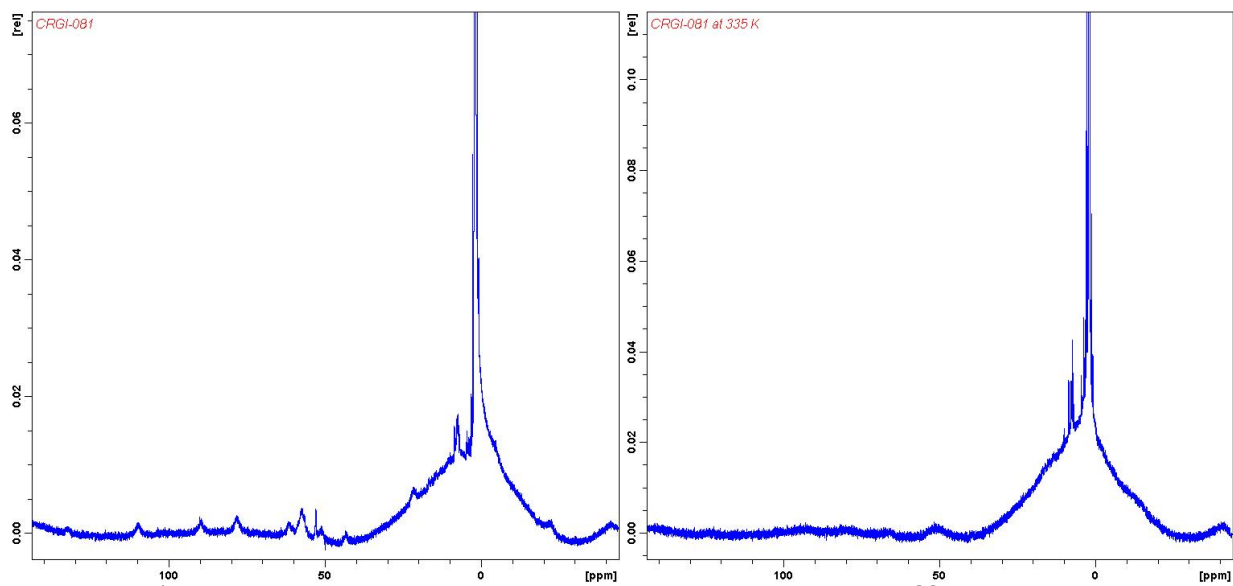

**Figure S8.**  $^1\text{H}$  NMR spectra (400 MHz) of a 20 mM solution of  $[\text{Fe}(\text{L}^{\text{Me}2})\text{Cl}_2]$  in  $\text{CD}_3\text{CN}$  at 294 K (left) and 335 K (right).

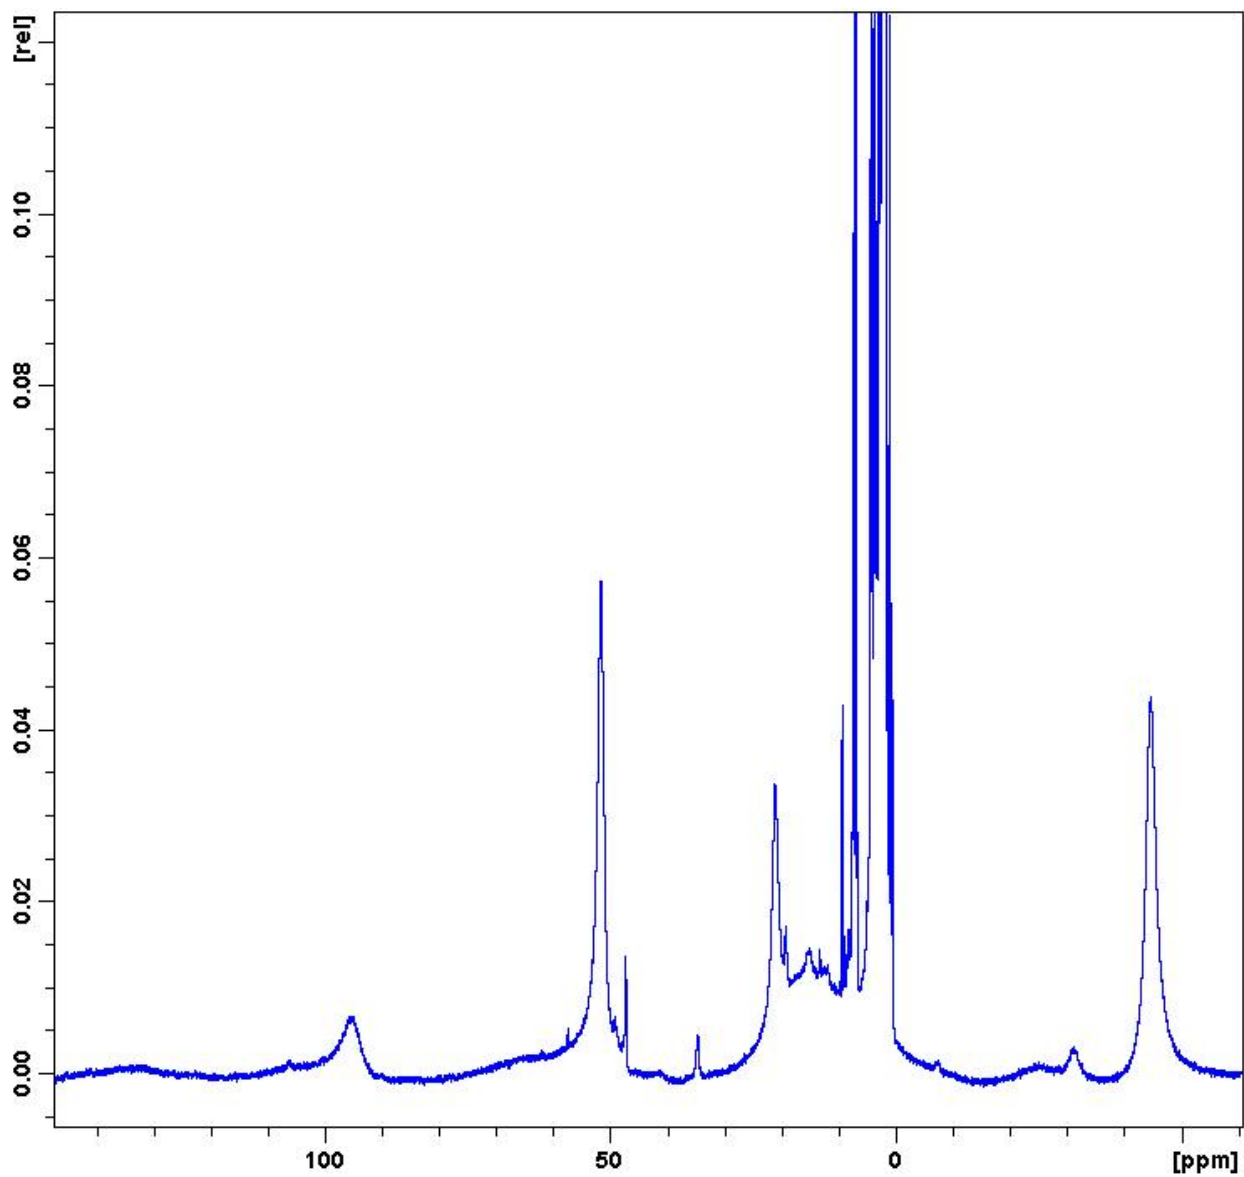

**Figure S9.**  $^1\text{H}$  NMR spectrum of a 20 mM solution of  $[\text{Fe}(\text{L}^{\text{Me}}_4)\text{Cl}_2]$  in  $\text{CD}_3\text{CN}$ . Major peaks outside the diamagnetic region:  $\delta$  133.9, 106.4, 65.0, 51.7, 47.4, 35.1, 21.5, 19.3, 14.8, -7.3, -31.1, -44.7. These data were recorded on a 250 MHz NMR instrument.

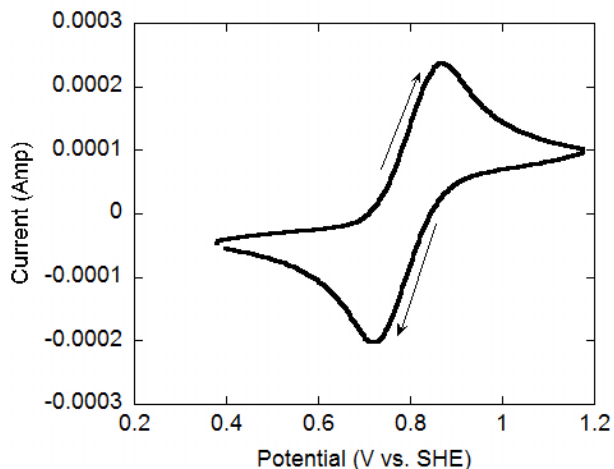

**Figure S10.** Cyclic voltammogram for  $[\text{Mn}(\text{L})\text{Cl}_2]$  in a 0.10 M solution of tetrabutylammonium perchlorate in acetonitrile.  $\text{L} = N,N$ -bis(2-pyridylmethyl)-1,2-ethanediamine. Ferrocene was subsequently added to reference the spectrum. For this particular scan:  $E_{pc} = 870$  mV vs SHE,  $I_{pc} = 2.4 \times 10^{-4}$  Amp,  $E_{pa} = 721$  mV vs SHE,  $I_{pa} = 2.3 \times 10^{-4}$  Amp,  $E_{1/2} = +795$  mV vs. SHE,  $\Delta E = 149$  mV. The arrows indicate the direction of the scan.

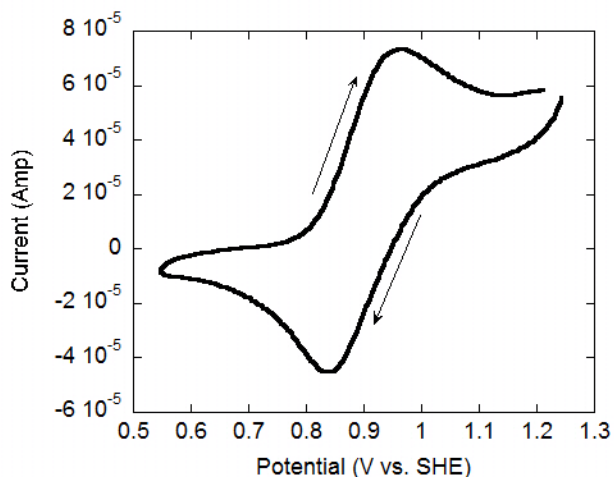

**Figure S11.** Cyclic voltammogram for  $[\text{Mn}(\text{L}^{\text{Me}1})\text{Cl}_2]$  in a 0.10 M solution of tetrabutylammonium perchlorate in acetonitrile.  $\text{L}^{\text{Me}1} = N$ -methyl- $N,N'$ -bis(2-pyridylmethyl)-1,2-ethanediamine. Ferrocene was subsequently added to reference the spectrum. For this particular scan:  $E_{pc} = 963$  mV vs SHE,  $I_{pc} = 6.9 \times 10^{-5}$  Amp,  $E_{pa} = 837$  mV vs SHE,  $I_{pa} = 6.1 \times 10^{-5}$  Amp,  $E_{1/2} = +900$  mV vs. SHE,  $\Delta E = 126$  mV. The arrows indicate the direction of the scan.



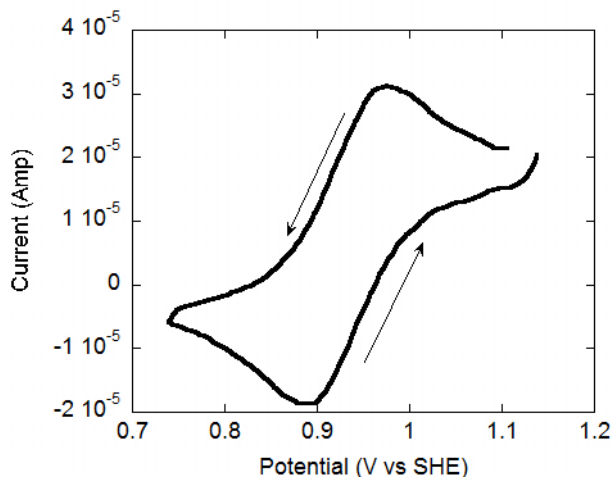

**Figure S12.** Cyclic voltammogram for  $[\text{Mn}(\text{L}^{\text{Me}2})\text{Cl}_2]$  in a 0.10 M solution of tetrabutylammonium perchlorate in acetonitrile.  $\text{L}^{\text{Me}2} = N,N'$ -dimethyl- $N,N'$ -bis(2-pyridylmethyl)-1,2-ethanediamine. Ferrocene was subsequently added to reference the redox features. For this particular scan:  $E_{pc} = 976$  mV vs SHE,  $I_{pc} = 2.6 \times 10^{-5}$  Amp,  $E_{pa} = 888$  mV vs SHE,  $I_{pa} = 2.5 \times 10^{-5}$  Amp,  $E_{1/2} = +932$  mV vs. SHE,  $\Delta E = 88$  mV. The arrows indicate the direction of the scan.

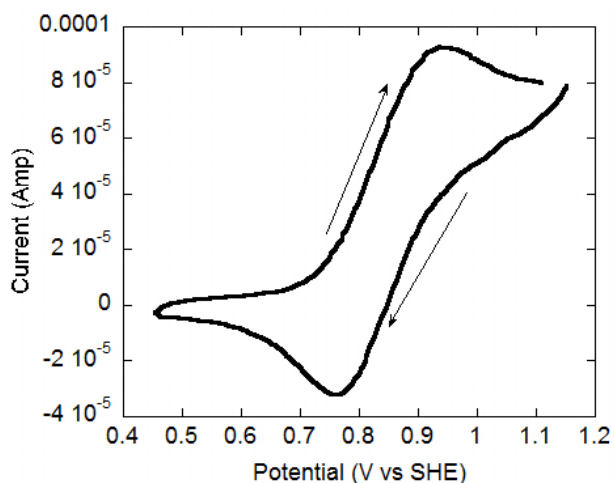

**Figure S13.** Cyclic voltammogram for  $[\text{Mn}(\text{L}^{\text{Me}2'})\text{Cl}_2]$  in a 0.10 M solution of tetrabutylammonium perchlorate in acetonitrile.  $\text{L}^{\text{Me}2'} = N,N'$ -bis(6-methyl-2-pyridylmethyl)-1,2-ethanediamine. Ferrocene was subsequently added to reference the redox features. For this particular scan:  $E_{pc} = 940$  mV vs SHE,  $I_{pc} = 8.6 \times 10^{-5}$  Amp,  $E_{pa} = 767$  mV vs SHE,  $I_{pa} = 5.0 \times 10^{-5}$  Amp,  $E_{1/2} = +854$  mV vs. SHE,  $\Delta E = 173$  mV. The arrows indicate the direction of the scan.

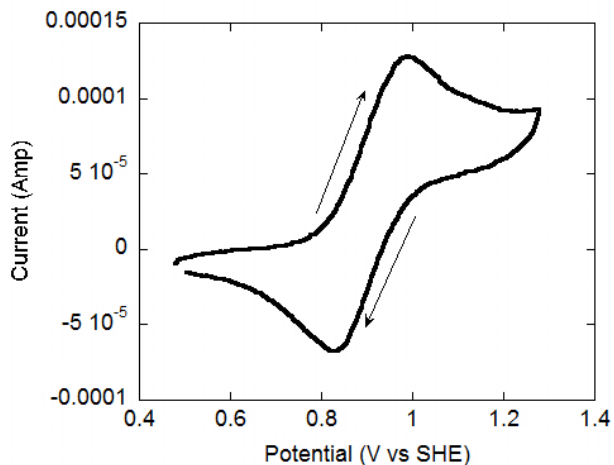

**Figure S14.** Cyclic voltammogram for  $[\text{Mn}(\text{L}^{\text{Me}3})\text{Cl}_2]$  in a 0.10 M solution of tetrabutylammonium perchlorate in acetonitrile.  $\text{L}^{\text{Me}3} = N\text{-methyl-}N,N'\text{-bis(6-methyl-2-pyridylmethyl)ethane-1,2-diamine}$ . Ferrocene subsequently added as an internal reference. For this particular scan:  $E_{pc} = 987$  mV vs SHE,  $I_{pc} = 1.23 \times 10^{-4}$  Amp,  $E_{pa} = 829$  mV vs SHE,  $I_{pa} = 9.7 \times 10^{-5}$  Amp,  $E_{1/2} = +908$  mV vs. SHE,  $\Delta E = 158$  mV. The arrows indicate the direction of the scan.

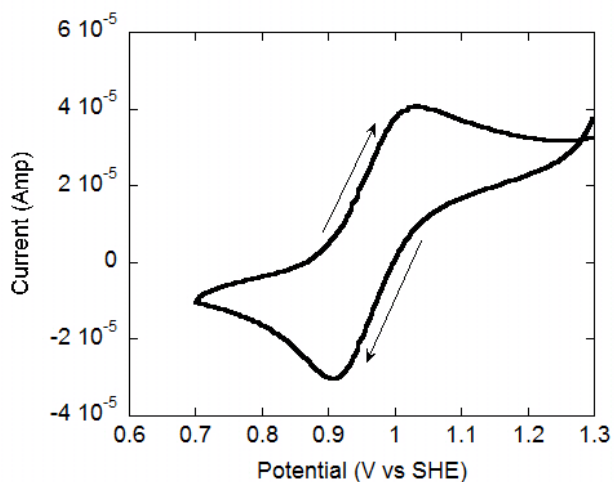

**Figure S15.** Cyclic voltammogram for  $[\text{Mn}(\text{L}^{\text{Me}4})\text{Cl}_2]$  in a 0.10 M solution of tetrabutylammonium perchlorate in acetonitrile.  $\text{L}^{\text{Me}4} = N,N'\text{-dimethyl-}N,N'\text{-bis(6-methyl-2-pyridylmethyl)-1,2-ethanediamine}$ . Ferrocene was subsequently added to reference the redox features. For this particular spectrum:  $E_{pc} = 1034$  mV vs SHE,  $I_{pc} = 3.6 \times 10^{-5}$  Amp,  $E_{pa} = 907$  mV vs SHE,  $I_{pa} = 3.7 \times 10^{-5}$  Amp,  $E_{1/2} = +971$  mV vs. SHE,  $\Delta E = 127$  mV. The arrows indicate the direction of the scan.

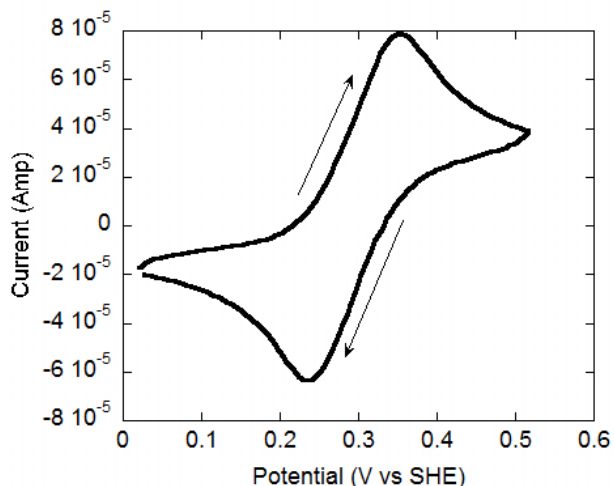

**Figure S16.** Cyclic voltammogram for  $[\text{Fe}(\text{L})\text{Cl}_2]$  in a 0.10 M solution of tetrabutylammonium perchlorate in acetonitrile.  $\text{L} = N,N$ -bis(2-pyridylmethyl)-1,2-ethanediamine. Ferrocene is subsequently added to reference the redox features. For this particular scan:  $E_{pc} = 349$  mV vs SHE,  $I_{pc} = 7.7 \times 10^{-5}$  Amp,  $E_{pa} = 228$  mV vs SHE,  $I_{pa} = 7.1 \times 10^{-5}$  Amp,  $E_{1/2} = +289$  mV vs. SHE,  $\Delta E = 121$  mV. The arrows indicate the direction of the scan.

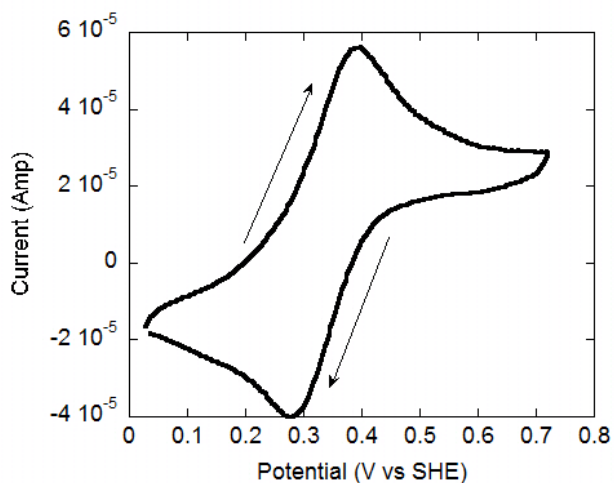

**Figure S17.** Cyclic voltammogram for  $[\text{Fe}(\text{L}^{\text{Me}1})\text{Cl}_2]$  in a 0.10 M solution of tetrabutylammonium perchlorate in acetonitrile.  $\text{L}^{\text{Me}1} = N$ -methyl- $N,N'$ -bis(2-pyridylmethyl)-1,2-ethanediamine. Ferrocene is subsequently added as an internal standard. For this particular scan:  $E_{pc} = 389$  mV vs SHE,  $I_{pc} = 4.8 \times 10^{-5}$  Amp,  $E_{pa} = 275$  mV vs SHE,  $I_{pa} = 5.1 \times 10^{-5}$  Amp,  $E_{1/2} = +332$  mV vs. SHE,  $\Delta E = 114$  mV. The arrows indicate the direction of the scan.

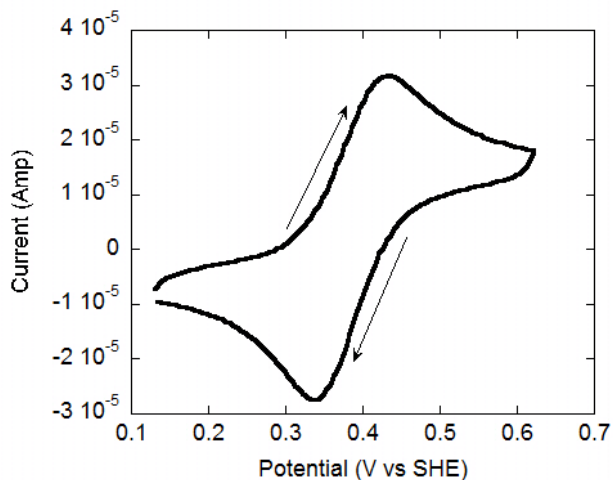

**Figure S18.** Cyclic voltammogram for  $[\text{Fe}(\text{L}^{\text{Me}2})\text{Cl}_2]$  in a 0.10 M solution of tetrabutylammonium perchlorate in acetonitrile.  $\text{L}^{\text{Me}2} = N,N'$ -dimethyl- $N,N'$ -bis(2-pyridylmethyl)-1,2-ethanediamine. Ferrocene is subsequently added as an internal standard. For this particular scan:  $E_{pc} = 431$  mV vs SHE,  $I_{pc} = 2.9 \times 10^{-5}$  Amp,  $E_{pa} = 338$  mV vs SHE,  $I_{pa} = 3.5 \times 10^{-5}$  Amp,  $E_{1/2} = +385$  mV vs. SHE,  $\Delta E = 93$  mV. The arrows indicate the direction of the scan.

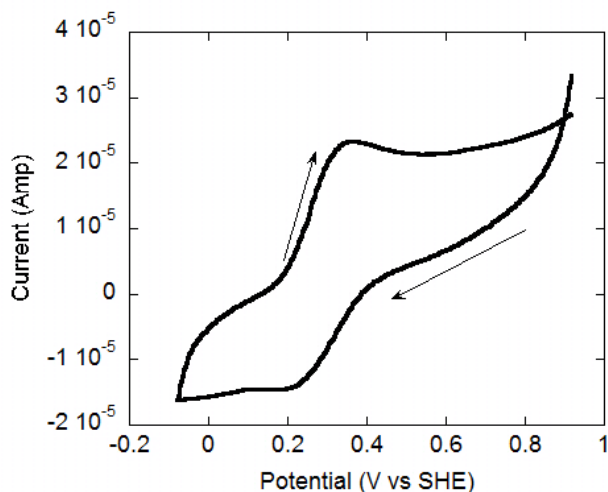

**Figure S19.** Cyclic voltammogram for  $[\text{Fe}(\text{L}^{\text{Me}2'})\text{Cl}_2]$  in a 0.10 M solution of tetrabutylammonium perchlorate in acetonitrile.  $\text{L}^{\text{Me}2'} = N,N$ -bis(6-methyl-2-pyridylmethyl)-1,2-ethanediamine. Ferrocene was subsequently added to reference the redox features. For this particular scan:  $E_{pc} = 361$  mV vs SHE,  $I_{pc} = 1.8 \times 10^{-5}$  Amp,  $E_{pa} = 208$  mV vs SHE,  $I_{pa} = 1.1 \times 10^{-5}$  Amp,  $E_{1/2} = +285$  mV vs. SHE,  $\Delta E = 153$  mV. The arrows indicate the direction of the scan.

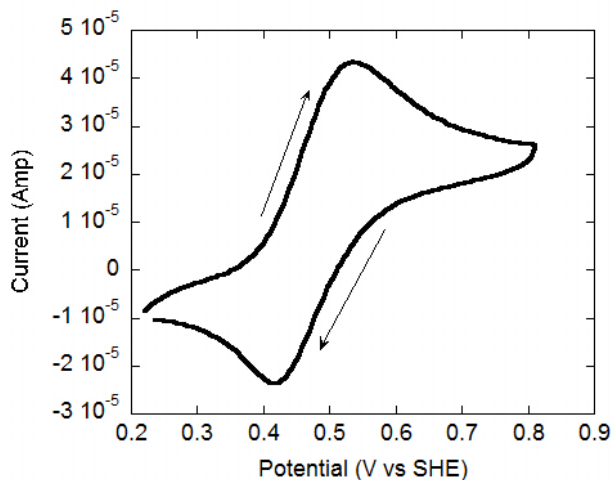

**Figure S20.** Cyclic voltammogram for  $[\text{Fe}(\text{L}^{\text{Me}3})\text{Cl}_2]$  in a 0.10 M solution of tetrabutylammonium perchlorate in acetonitrile.  $\text{L}^{\text{Me}3} = N\text{-methyl-}N,N'\text{-bis(6-methyl-2-pyridylmethyl)ethane-1,2-diamine}$ . Ferrocene is subsequently added to reference the redox features. For this particular scan:  $E_{pc} = 534$  mV vs SHE,  $I_{pc} = 3.7 \times 10^{-5}$  Amp,  $E_{pa} = 418$  mV vs SHE,  $I_{pa} = 3.4 \times 10^{-5}$  Amp,  $E_{1/2} = +476$  mV vs. SHE,  $\Delta E = 116$  mV. The arrows indicate the direction of the scan.

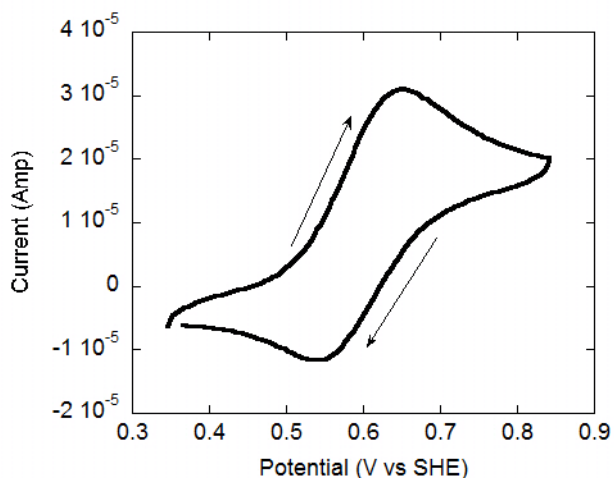

**Figure S21.** Cyclic voltammogram for  $[\text{Fe}(\text{L}^{\text{Me}4})\text{Cl}_2]$  in a 0.10 M solution of tetrabutylammonium perchlorate in acetonitrile.  $\text{L}^{\text{Me}4} = N,N'\text{-dimethyl-}N,N'\text{-bis(6-methyl-2-pyridylmethyl)-1,2-ethanediamine}$ . Ferrocene is subsequently added as an internal standard. For this particular scan:  $E_{pc} = 651$  mV vs SHE,  $I_{pc} = 2.6 \times 10^{-5}$  Amp,  $E_{pa} = 541$  mV vs SHE,  $I_{pa} = 1.9 \times 10^{-5}$  Amp,  $E_{1/2} = +596$  mV vs. SHE,  $\Delta E = 110$  mV. The arrows indicate the direction of the scan.

**Table S1.** Selected crystallographic data for [Mn(L)(H<sub>2</sub>O)Cl]<sub>2</sub>(MnCl<sub>4</sub>), [Mn(L<sup>Me</sup><sub>3</sub>)(H<sub>2</sub>O)Cl]<sub>2</sub>, and [Mn(L<sup>Me</sup><sub>2</sub>'-ox)Cl]<sub>2</sub>.

| Parameter                       | [Mn(L)(H <sub>2</sub> O)Cl] <sub>2</sub> (MnCl <sub>4</sub> )                                 | [Mn(L <sup>Me</sup> <sub>3</sub> )(H <sub>2</sub> O)Cl] <sub>2</sub> | [Mn(L <sup>Me</sup> <sub>2</sub> '-ox)Cl] <sub>2</sub>           |
|---------------------------------|-----------------------------------------------------------------------------------------------|----------------------------------------------------------------------|------------------------------------------------------------------|
| Formula                         | C <sub>28</sub> H <sub>40</sub> Cl <sub>6</sub> Mn <sub>3</sub> N <sub>8</sub> O <sub>2</sub> | C <sub>17</sub> H <sub>24</sub> Cl <sub>2</sub> MnN <sub>4</sub> O   | C <sub>16</sub> H <sub>18</sub> Cl <sub>2</sub> MnN <sub>4</sub> |
| MW                              | 898.2                                                                                         | 426.24                                                               | 392.18                                                           |
| cryst syst                      | Monoclinic                                                                                    | Monoclinic                                                           | Monoclinic                                                       |
| space group                     | <i>C2/c</i> (#15)                                                                             | <i>P2<sub>1</sub>/c</i> (#14)                                        | <i>C2/c</i> (#15)                                                |
| a (Å)                           | 28.4241(12)                                                                                   | 11.3978(7)                                                           | 12.0792(9)                                                       |
| b (Å)                           | 8.5365(4)                                                                                     | 8.7356(6)                                                            | 9.6386(7)                                                        |
| c (Å)                           | 19.0616(9)                                                                                    | 20.5972(13)                                                          | 15.2205(11)                                                      |
| α (deg)                         | 90                                                                                            | 90                                                                   | 90                                                               |
| β (deg)                         | 122.7350(10)                                                                                  | 104.7320(10)                                                         | 101.7710(10)                                                     |
| γ (deg)                         | 90                                                                                            | 90                                                                   | 90                                                               |
| V (Å <sup>3</sup> )             | 3890.6(3)                                                                                     | 1983.4(2)                                                            | 1734.8(2)                                                        |
| Z                               | 4                                                                                             | 4                                                                    | 4                                                                |
| Cryst color                     | Colorless                                                                                     | Colorless                                                            | Light amber                                                      |
| T (K)                           | 193                                                                                           | 193                                                                  | 193                                                              |
| Reflns collected                | 17021                                                                                         | 19737                                                                | 8565                                                             |
| Unique reflns                   | 3922                                                                                          | 3551                                                                 | 2150                                                             |
| R1 (F, I > 2σ(I))               | 0.0352                                                                                        | 0.0543                                                               | 0.0440                                                           |
| wR2 (F <sup>2</sup> , all data) | 0.0823                                                                                        | 0.1417                                                               | 0.1211                                                           |

$$R1 = \frac{\sum ||F_o| - |F_c||}{\sum |F_o|}; wR2 = [\sum w(F_o^2 - F_c^2)^2 / \sum w(F_o^2)^2]^{1/2}.$$

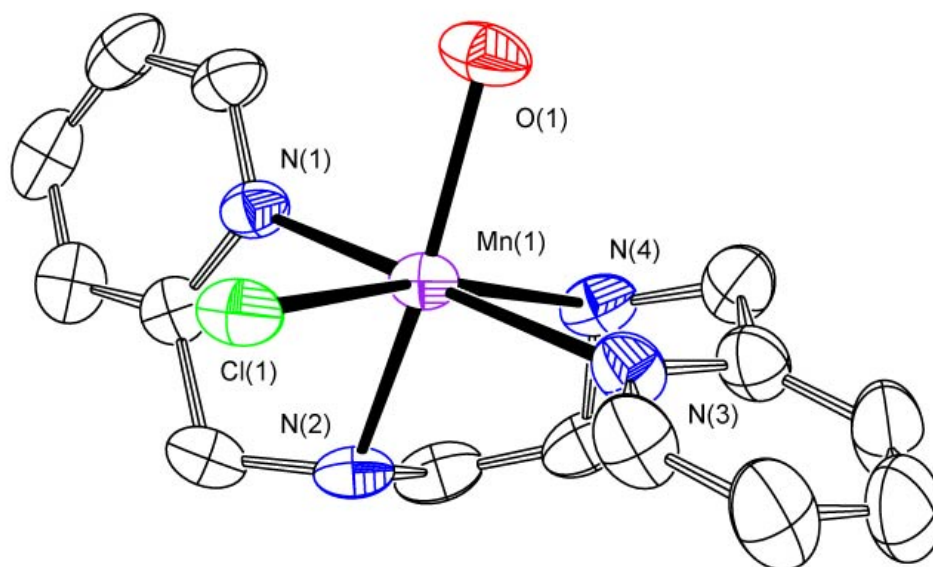

**Figure S22.** ORTEP representation of the crystal structure of the cation  $[\text{Mn}(\text{L})(\text{H}_2\text{O})\text{Cl}]^+$ . The hydrogen atoms and the other manganese species in the unit cell are omitted for clarity. Thermal ellipsoids are drawn at 50% probability.

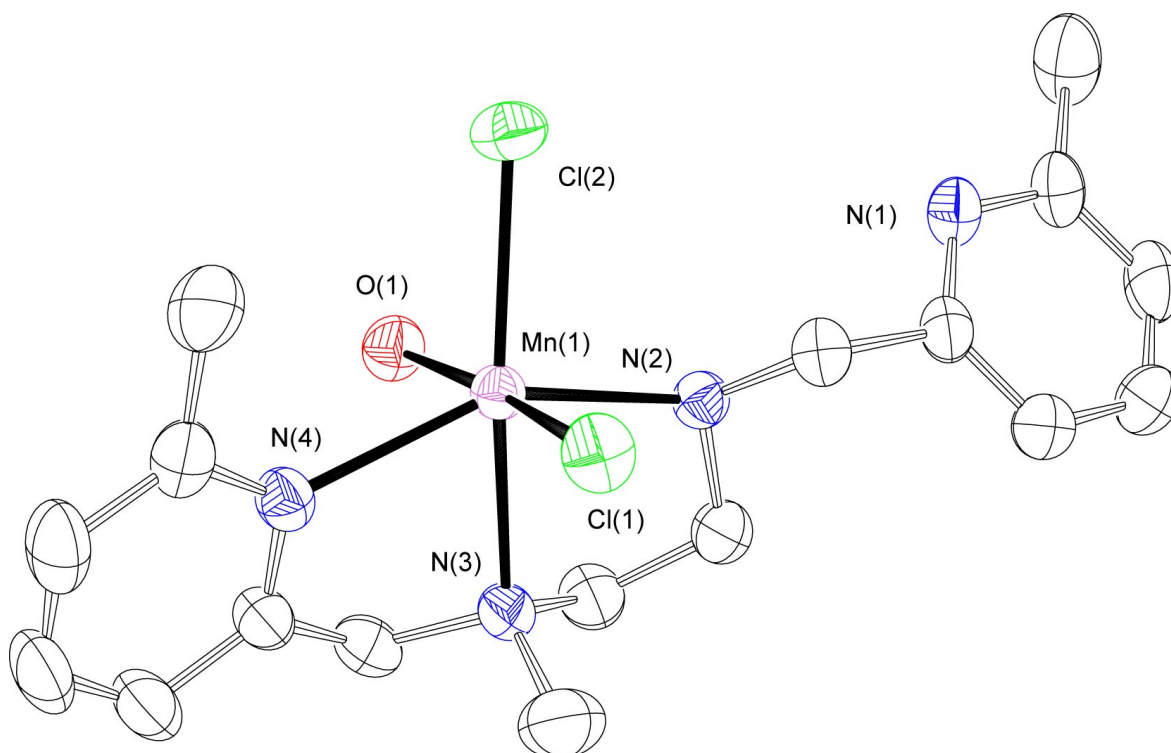

**Figure S23.** ORTEP representation of the crystal structure of  $[\text{Mn}(\text{L}^{\text{Me}3})(\text{H}_2\text{O})\text{Cl}_2]$ . Hydrogen atoms are omitted for clarity. Thermal ellipsoids are drawn at 50% probability.

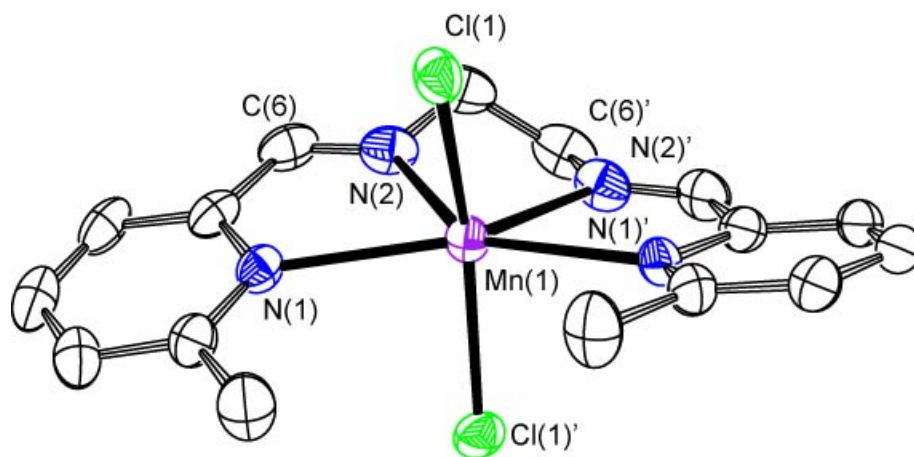

**Figure S24.** ORTEP representation of the crystal structure of  $[\text{Mn}(\text{L}^{\text{Me}2'\text{-ox}})\text{Cl}_2]$ . Hydrogen atoms are omitted for clarity. Thermal ellipsoids are drawn at 50% probability. The N(2)-C(6) bonds have been oxidized to double bonds, as indicated by the N-C bond lengths, which contract from 1.46 to 1.25 angstroms. The Mn-N and Mn-Cl bond distances do not change significantly from those in  $[\text{Mn}(\text{L}^{\text{Me}2'})\text{Cl}_2]$ ; these data and the pale color of the crystals suggest that the oxidation state of the manganese remains +2.
